# Supplementary material
Source: PubMed Central journal article supplement (PMC6241309)
Supplement: NIHMS972310-supplement.pdf [file NIHMS972310-supplement.pdf]

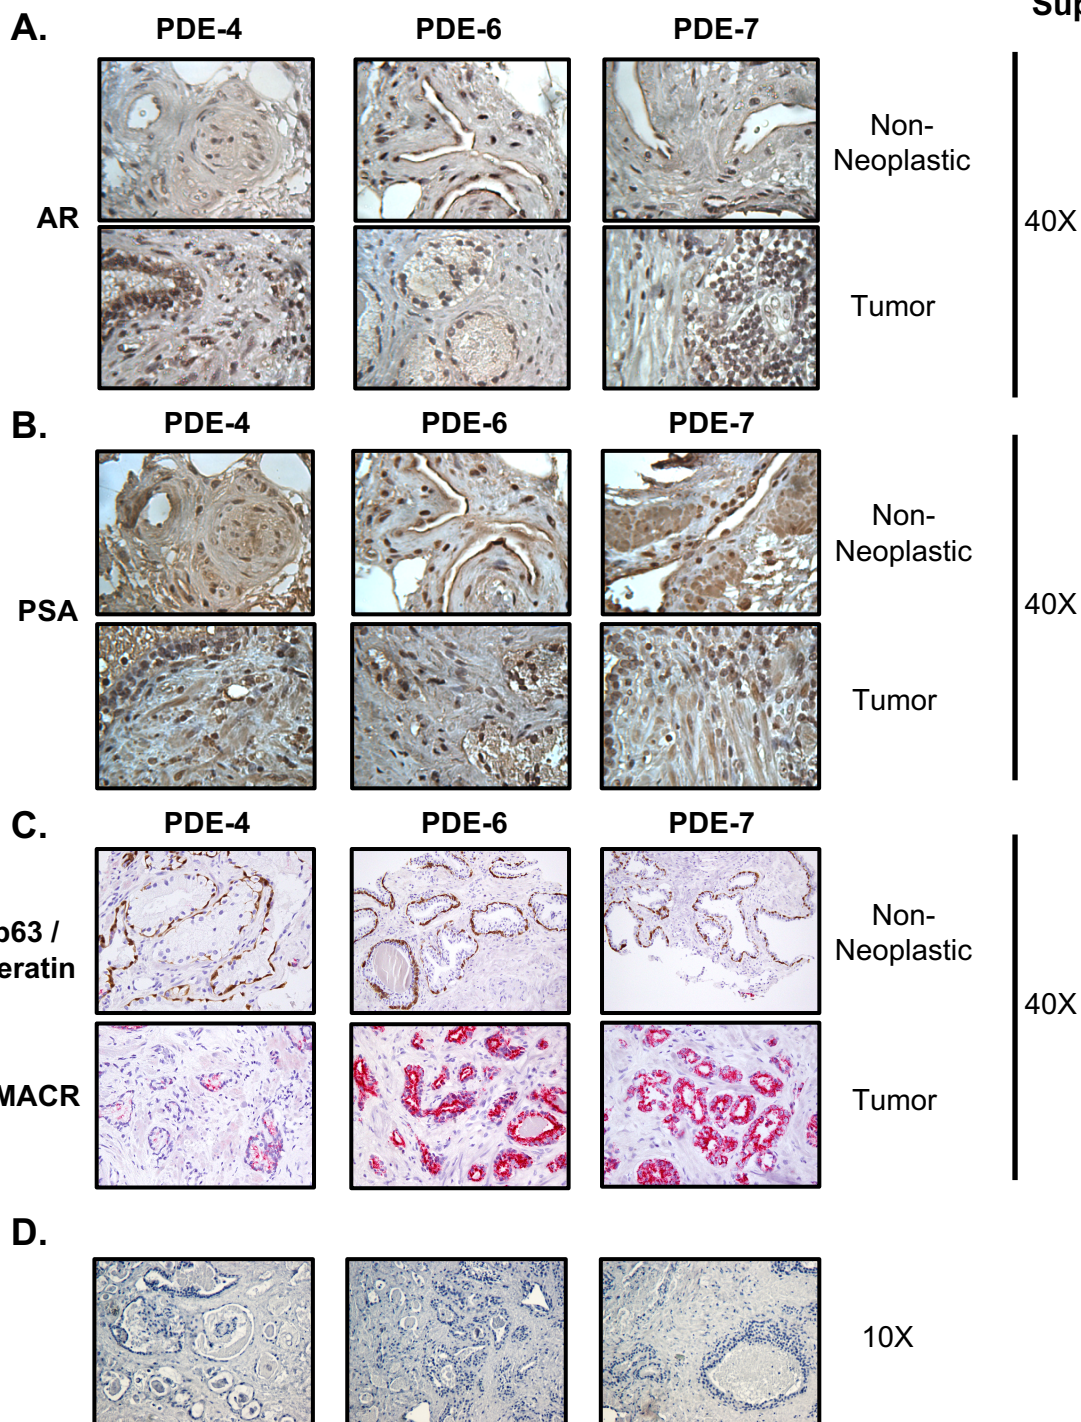

**Supplementary Figure 1. PCa PDE model sustains endogenous AR signaling.**

**A-B.** AR and PSA immunostaining of three additional PDE tumor tissue with matched non-neoplastic tissue after 6 days of *ex vivo* culture shown at 40X magnification. **C.** To validate histology, immunohistochemical staining was performed as a cocktail of antibodies to Acetyl Co-A racemase and the basal cell markers p63 & HMW keratin. Alkaline phosphatase (Red) was used to detect racemase expression. DAB (Brown) was used to detect basal cells. Images shown at 40X, n=3. **D.** IHC images of PDE tissues with no antibody staining as a negative control. Images shown at 10X, n=3.

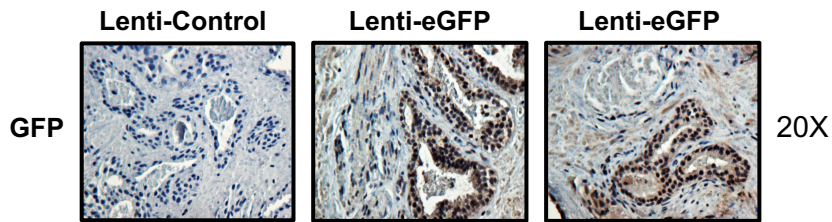

**Supplemental Figure 2. PDE model is amenable to transfection.** Expression of GFP was achieved through lentiviral transduction of PDE with an GFP-expressing lentivirus for 6 days to show efficiency of infection. Representative images show GFP IHC for tissue transfected with control plasmid (Lenti-Control) and GFP (Lenti-eGFP) after 6 days in *ex vivo* culture. Images are shown at 20X.

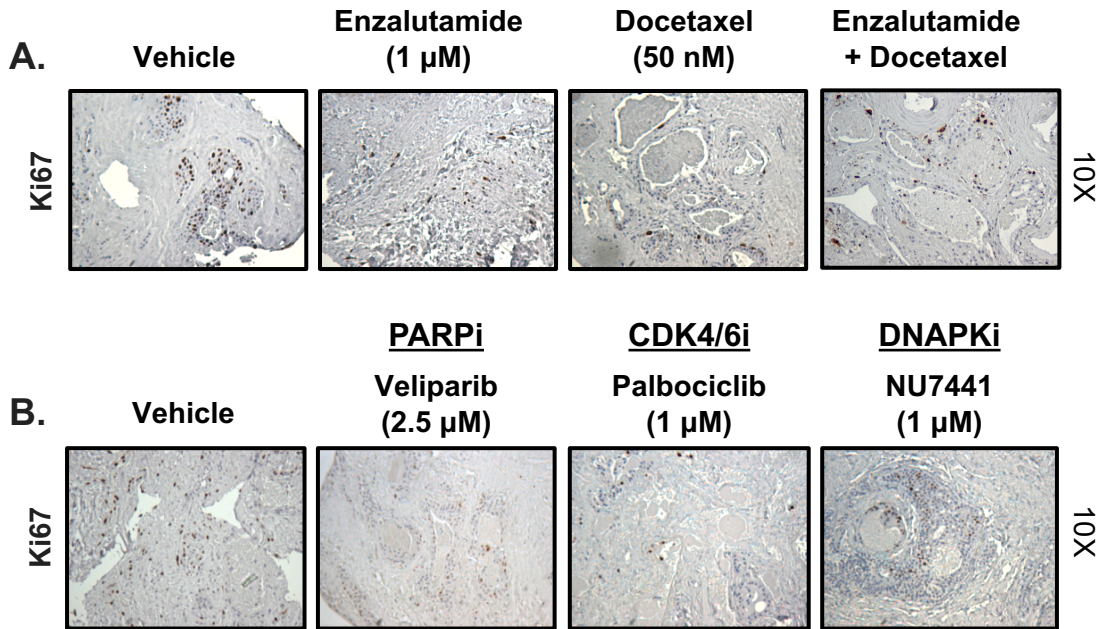

**Supplemental Figure 3. Various treatments reduce growth in PDE model. A.** For Ki67 images shown in Figure 4A, this figure shows the corresponding 10X magnification images for vehicle, AR antagonist (Enzalutamide), Taxane (Docetaxel), and AR antagonist (Enzalutamide) + Taxane (Docetaxel) treated tumors. **B.** Similarly for Ki67 images shown in Figure 4B, this figure shows the corresponding 10X magnification images for vehicle, PARP Inhibitor (Veliparib), CDK 4/6 Inhibitor (PD), and DNAPK Inhibitor (NU7441).

**Supplemental Table 1. Pathological Characteristics of Tumors Used in this Study**

| PDE | Age at Prostatectomy (years) | PSA (ng/mL) | Gleason Grade | Pathological Stage | Race             | Samples Acquired |
|-----|------------------------------|-------------|---------------|--------------------|------------------|------------------|
| 1   | 68                           | 8.4         | 3+4=7         | cT1c               | Caucasian        | E, I             |
| 2   | 69                           | 5.3         | 3+4=7         | cT2b               | Caucasian        | E, I             |
| 3   | 66                           | 7.4         | 4+4=8         | T1c                | Caucasian        | E, I             |
| 4   | 57                           | 4.0         | 3+4=7         | n/a                | Caucasian        | I, R             |
| 5   | 70                           | 10.3        | 4+4=8         | cT1c               | Hispanic         | I, R             |
| 6   | 55                           | n/a         | 3+4=7         | n/a                | not recorded     | I, R             |
| 7   | 60                           | 5.7         | 4+3=7         | cT1c               | Caucasian        | I, R             |
| 8   | 57                           | 7.4         | 4+5=9         | cT1c               | not recorded     | I                |
| 9   | 74                           | 10.3        | 4+4=8         | n/a                | Caucasian        | I, R             |
| 10  | 59                           | n/a         | 4+4=8         | n/a                | not recorded     | I                |
| 11  | 86                           | 5.2         | 4+3=7         | cT1c               | Caucasian        | I, R, T          |
| 12  | 51                           | 14.9        | 3+4=7         | n/a                | Caucasian        | I, R, T          |
| 13  | 66                           | 5.3         | 3+4=7         | n/a                | not recorded     | I, R, T          |
| 14  | 61                           | 4.8         | 4+4=8         | n/a                | African American | I                |
| 15  | 60                           | 5.7         | 4+3=7         | cT1c               | Caucasian        | I                |
| 16  | 68                           | 46.2        | 4+3=7         | n/a                | African American | I                |
| 17  | 63                           | 7.6         | 3+4=7         | cT1c               | not recorded     | I                |
| 18  | 65                           | 4.9         | 4+3=7         | T1c                | Caucasian        | I                |
| 19  | 71                           | 4.0         | 3+4=7         | T1c                | not recorded     | I                |
| 20  | 68                           | 3.7         | 3+4=7         | T1c                | African American | I                |
| 21  | 68                           | 7.1         | 4+4=8         | T1c                | not recorded     | I, T             |
| 22  | 72                           | 37.5        | 4+5=9         | n/a                | Caucasian        | I                |
| 23  | 54                           | 4.6         | 4+5=9         | T1c                | not recorded     | I                |
| 24  | 70                           | 5.4         | 3+4=7         | n/a                | African American | I, T             |
| 25  | 53                           | 4.3         | 3+4=7         | T3a                | not recorded     | E                |
| 26  | 59                           | 4           | 4+5=9         | T3a                | not recorded     | E                |
| 27  | 71                           | 6.5         | 4+3=7         | T3a                | not recorded     | E                |
| 28  | 60                           | 11.6        | 3+4=7         | T3a                | not recorded     | E                |
| 29  | 53                           | 8.3         | 3+4=7         | T3a                | not recorded     | E                |
| 30  | 71                           | 8.9         | 3+4=7         | T3a                | not recorded     | E                |
| 31  | 60                           | 9           | 3+4=7         | T3a                | not recorded     | E                |
| 32  | 67                           | 9.2         | 3+4=7         | T3a                | not recorded     | E                |
| 33  | 75                           | 10          | 4+3=7         | T3a                | not recorded     | E                |
| 34  | 70                           | 5.4         | 4+3=7         | T3a                | not recorded     | E                |
| 35  | 71                           | 3.6         | 4+5=9         | T3b                | not recorded     | E                |
| 36  | 66                           | 5.2         | 3+4=7         | T2c                | not recorded     | E                |
| 37  | 55                           | 9.7         | 3+4=7         | T2c                | not recorded     | E                |

Abbreviations: E – ELISA, I – IHC, R – RNA, and T – TME analyses
